# Supplementary material for: Influence of organic matters on the adsorption–desorption of 1,2-dichloroethane on soil in water and model saturated aquifer
Source: Royal Society of Chemistry journal article supplement (doi:10.1039/d3ra06568e), 2024-01-01
Supplement: d3ra06568e1.pdf [file d3ra06568e1.pdf]

## Supporting Information

### **Influence of organic matters on the adsorption-desorption of 1,2-dichloroethane on soil in water and model saturated aquifer**

Xinhong Huang<sup>1,3</sup>, Yan Liang<sup>1\*,2,3</sup>, Jinhua Yun<sup>1,3</sup>, Feishu Cao<sup>2,4</sup>, Tian Xie<sup>2,4</sup>, Hainong Song<sup>2,4</sup>,  
and Shuangfei Wang<sup>2,5</sup>

<sup>1</sup>School of Resources, Environment and Materials, Guangxi University, Nanning 530004, China

<sup>2</sup>Guangxi Bossco Environmental Protection Technology Co., Ltd, Nanning 530007, China

<sup>3</sup>Key Laboratory of Environmental Protection (Guangxi University), Education Department of  
Guangxi Zhuang Autonomous Region, Nanning 530004, Guangxi, China

<sup>4</sup>Guangxi Key Laboratory of Environmental Pollution Control and Ecosystem Restoration, Nanning  
530007, Guangxi, China

<sup>5</sup>College of Light Industry and Food Engineering, Guangxi University, Nanning 530004, China

## **Introduction**

Supplementary information includes a brief description and discussion of the following: **(i)** Adsorption model (S1); **(ii)** Comparisons of UV spectra of FA, HA, and 1,2-DCA with different combinations (Fig. S1); **(iii)** Fourier Transform infrared spectroscopy (FT-IR) spectra of FA and HA-treated loamy sand, sandy loam, and FA and HA. (Fig. S2); **(iv)** X-Ray Diffraction (XRD) patterns of FA and HA-treated loamy sand, sandy loam, and the FA and HA, respectively (Fig. S3); **(v)** Particle size distribution of original and treated soils (Table S1); **(vi)** Properties of original soils (Table S2); **(vii)** Chemical analysis for the original and treated soils with high temperature and H<sub>2</sub>O<sub>2</sub> (Table S3); **(viii)** Zeta potential of soils under different conditions (Table S4); **(ix)** The pH of soils under different conditions (Table S5); **(x)** Percentages of 1,2-DCA mass recovered from the column effluents during the retention and release phases (Table S6); **(xi)** Percentages of 1,2-DCA mass recovered from the column effluents during the retention and release phases (Table S7).

## S1. Adsorption model

The pseudo-first-order<sup>1</sup> and second-order kinetic models<sup>2</sup> were used to describe the adsorption kinetics of 1,2-DCA by soil. Linear model and Freundlich model<sup>3</sup> were used to fit the adsorption isotherms.

Pseudo-first-order kinetic equation:

$$Q_t = Q_{e1}(1 - e^{-K_1 t}) \quad (S1)$$

Pseudo-second-order kinetic equation:

$$Q_t = \frac{K_2 Q_{e2}^2 t}{1 + K_2 Q_{e2} t} \quad (S2)$$

where  $K_1$  is the pseudo-first-order kinetic rate constant ( $h^{-1}$ ),  $K_2$  is the pseudo-second-order kinetic rate constant ( $g\ mg^{-1}\ h^{-1}$ ),  $Q_t$  is the adsorption capacity ( $mg\ g^{-1}$ ) with the variable  $t$  (time, h),  $Q_{e1}$  and  $Q_{e2}$  are the equilibrium adsorption capacities ( $mg\ g^{-1}$ ).

Linear equation:

$$Q = K_d C_e \quad (S3)$$

Freundlich equation:

$$Q = K_f C_e^{\frac{1}{n}} \quad (S4)$$

where  $Q$  is the adsorbed amount of 1,2-DCA ( $mg\ g^{-1}$ ),  $C_e$  is the aqueous concentration of 1,2-DCA at equilibrium ( $mg\ L^{-1}$ ),  $K_d$  is the distribution coefficient from linear equation ( $L\ kg^{-1}$ ),  $K_f$  is the Freundlich constant associated with adsorption capacity ( $L\ kg^{-1}$ ), and  $n$  is the favorability degree of the adsorption process.

## References

1. Ho, Y. and McKay, G., 1998a. The kinetics of sorption of basic dyes from aqueous solution by sphagnum moss peat. *The Canadian Journal of Chemical Engineering* 76, 822-827.
2. Ho, Y. and McKay, G., 1998b. Kinetic models for the sorption of dye from aqueous solution by wood. *Process Safety and Environmental Protection* 76 (2), 183-191.
3. Freundlich, H.F.M., 1906. Über die adsorption in lösungen. *Zeitschrift für Physikalische Chemie* 57, 115-124.

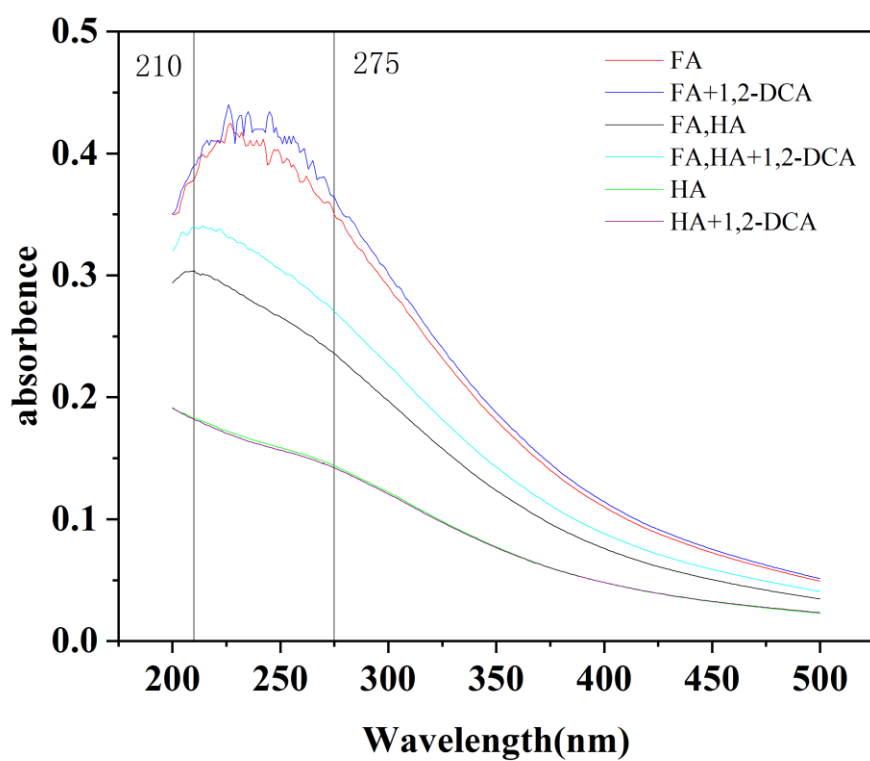

Fig. S1. Comparisons of UV spectra of fulvic acid (FA), humic acid (HA), and 1,2-Dichloroethane (1,2-DCA) with different combinations.

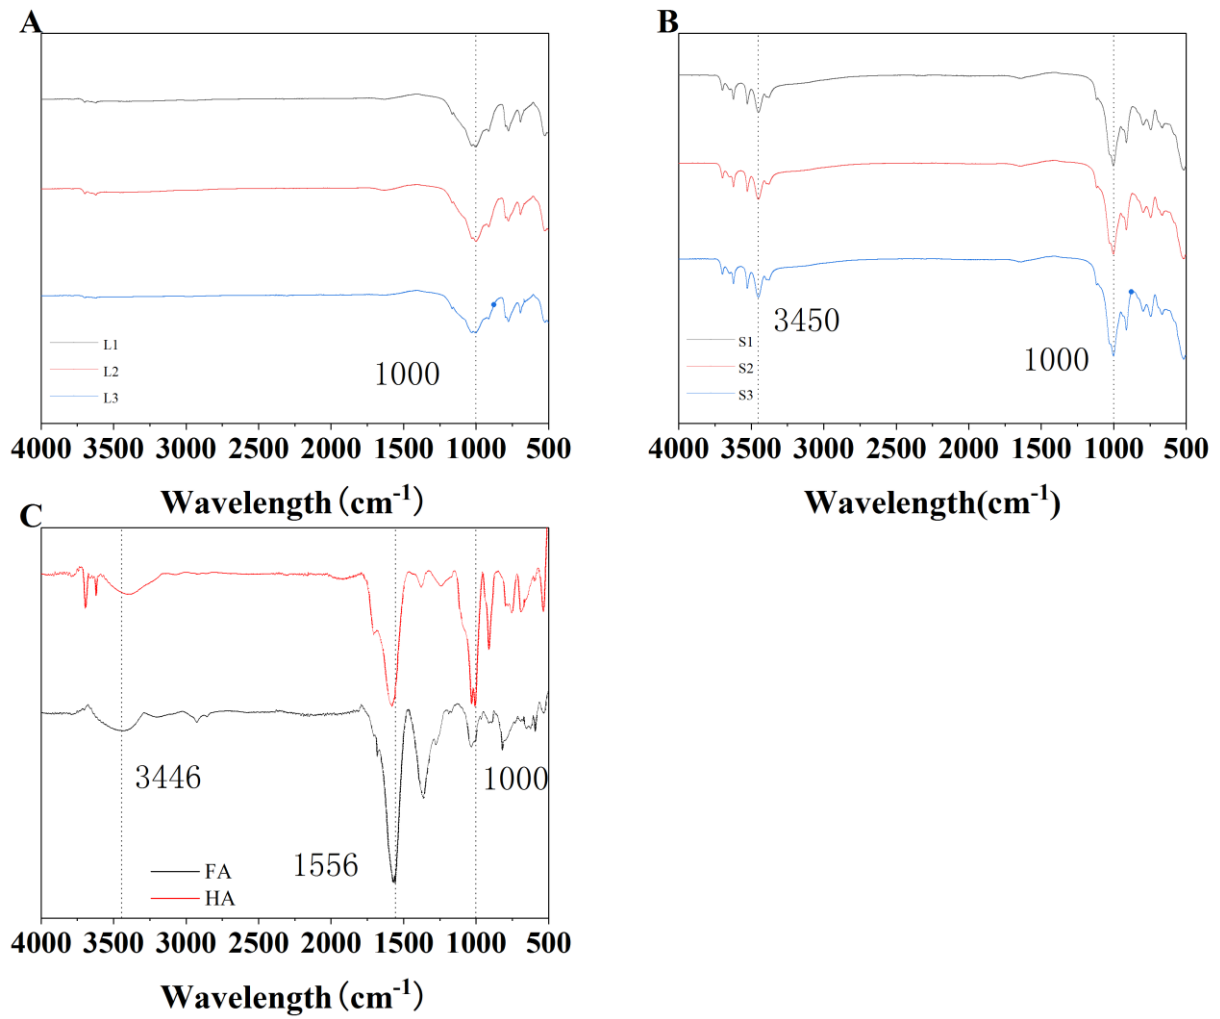

Fig. S2. The FTIR spectra of FA and HA-treated loamy sand (A), sandy loam (B), and FA and HA (C). The L1 and S1 contain 50 ppm FA, L2 and S2 contain 25 ppm FA and 25 ppm HA mixtures, and the L3 and S3 contain 50 ppm HA.

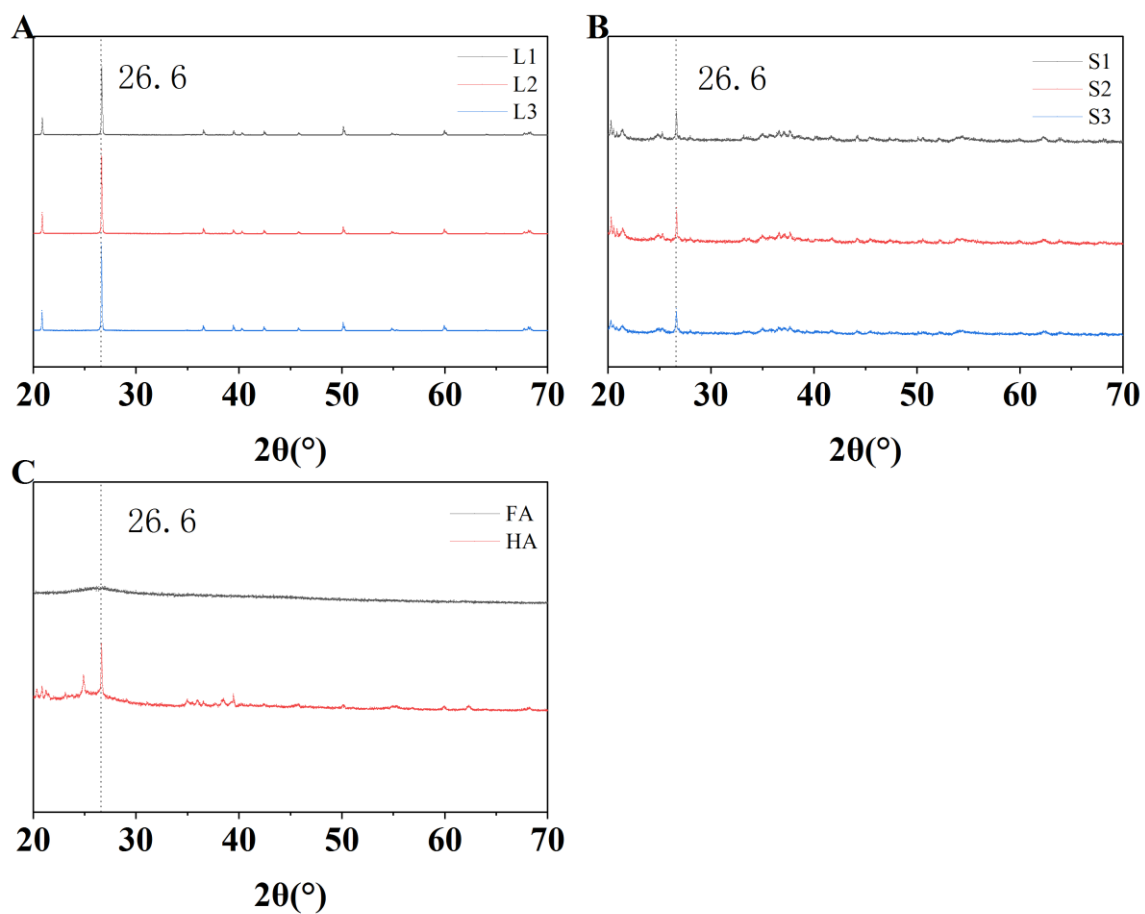

Fig. S3. The XRD patterns of FA and HA-treated loamy sand (A), sandy loam (B), and the FA and HA (C), respectively. L1 and S1 contain 50 ppm FA, L2, and S2 contain 25 ppm FA with 25 ppm HA, and L3 and S3 contain 50 ppm HA.

Table S1. Particle size distribution of original and treated soils.

| Particle size (mm) | 0.45-2 | 0.25-0.45 | 0.15-0.25 | 0.075-0.15 | 0.05-0.075 | Total  |
|--------------------|--------|-----------|-----------|------------|------------|--------|
| Loamy sand         | 34.5%  | 10.3%     | 6.9%      | 29.5%      | 18.8%      | 100.0% |
| Treated loamy sand | 46.9%  | 9.4%      | 8.4%      | 20.1%      | 15.2%      | 100.0% |
| Sandy loam         | 48.0%  | 23.7%     | 11.2%     | 13.0%      | 4.1%       | 100.0% |
| Treated sandy loam | 53.9%  | 14.3%     | 16.4%     | 9.6%       | 5.8%       | 100.0% |



Table S2. Properties of original soils.

| Type                             | Loamy sand      | Sandy loam      |
|----------------------------------|-----------------|-----------------|
| pH                               | $6.29 \pm 0.09$ | $6.91 \pm 0.11$ |
| Moisture content (%)             | $3.13 \pm 0.26$ | $7.69 \pm 0.33$ |
| Humic acid content (%)           | $0.28 \pm 0.02$ | $0.92 \pm 0.07$ |
| TOC (%)                          | $1.97 \pm 0.11$ | $4.83 \pm 0.24$ |
| Conductivity of solution (mS/cm) | $129.4 \pm 3.3$ | $33.3 \pm 1.4$  |

Table S3. Chemical analysis for the original and treated soils with high temperature and H<sub>2</sub>O<sub>2</sub>.

| Element (%)        | C           | H           | O            | N           | S           |
|--------------------|-------------|-------------|--------------|-------------|-------------|
| Loamy sand         | 0.430±0.130 | 1.147±0.064 | 4.303±0.375  | 0.035±0.005 | 0.776±0.195 |
| Treated loamy sand | —           | 0.900±0.111 | 1.875±0.420  | 0.050±0.000 | 0.877±0.079 |
| Sandy loam         | 0.345±0.035 | 2.135±0.192 | 17.644±0.380 | 0.090±0.010 | 1.010±0.038 |
| Treated sandy loam | —           | 1.646±0.182 | 11.431±0.213 | 0.065±0.015 | 1.165±0.112 |

Table S4. Zeta potential of soils under different conditions.

| Zeta potential (mV)        | Loam sand       | Treated loam sand | Sandy loam      | Treated sandy loam |
|----------------------------|-----------------|-------------------|-----------------|--------------------|
| Without HA and FA          | $-14.3 \pm 0.3$ | $-27.9 \pm 1.9$   | $-6.40 \pm 1.3$ | $-6.03 \pm 0.3$    |
| 0 (50 ppm FA)              | $-14.1 \pm 1.2$ | $-23.6 \pm 1.5$   | $-15.3 \pm 1.5$ | $-4.82 \pm 0.2$    |
| 20% (40 ppm FA, 10 ppm HA) | $-14.4 \pm 0.7$ | $-28.3 \pm 0.3$   | $-22.4 \pm 1.4$ | $-6.90 \pm 1.4$    |
| 40% (30 ppm FA, 20 ppm HA) | $-13.7 \pm 0.4$ | $-30.6 \pm 0.6$   | $-23.1 \pm 0.4$ | $-13.7 \pm 1.5$    |
| 60% (20 ppm FA, 30 ppm HA) | $-13.4 \pm 0.9$ | $-40.5 \pm 0.8$   | $-24.1 \pm 0.4$ | $-16.8 \pm 0.5$    |
| 80% (10 ppm FA, 40 ppm HA) | $-13.1 \pm 1.5$ | $-44.5 \pm 0.7$   | $-26.2 \pm 1.3$ | $-18.9 \pm 1.4$    |
| 100% (50 ppm HA)           | $-8.30 \pm 1.7$ | $-48.1 \pm 0.7$   | $-26.9 \pm 0.2$ | $-20.2 \pm 0.6$    |

Table S5. The pH of soils under different conditions.

| pH                         | Loamy sand  | Treated loamy sand | Sandy loam  | Treated sand |
|----------------------------|-------------|--------------------|-------------|--------------|
| Without HA and FA          | 6.29 ± 0.21 | 6.83 ± 0.15        | 6.91 ± 0.17 | 7.24 ± 0.14  |
| 0 (50 ppm FA)              | 6.15 ± 0.15 | 6.77 ± 0.21        | 5.36 ± 0.16 | 6.37 ± 0.13  |
| 20% (40 ppm FA, 10 ppm HA) | 6.30 ± 0.18 | 7.07 ± 0.14        | 5.79 ± 0.12 | 6.55 ± 0.17  |
| 40% (30 ppm FA, 20 ppm HA) | 6.69 ± 0.11 | 7.22 ± 0.19        | 6.40 ± 0.16 | 6.54 ± 0.19  |
| 60% (20 ppm FA, 30 ppm HA) | 7.06 ± 0.13 | 7.57 ± 0.11        | 6.43 ± 0.15 | 6.83 ± 0.17  |
| 80% (10 ppm FA, 40 ppm HA) | 7.31 ± 0.21 | 7.80 ± 0.14        | 6.53 ± 0.21 | 6.83 ± 0.16  |
| 100% (50 ppm HA)           | 7.41 ± 0.25 | 7.93 ± 0.17        | 6.52 ± 0.19 | 6.84 ± 0.15  |

Table S6. Percentages of 1,2-DCA mass recovered from the column effluents during the retention and release phases (corresponding to Fig. 9).

| Type       | Infused 50 mg/L<br>1,2-DCA with<br>mixtures of FA and<br>HA (ppm) | Column<br>porosity | Recovery of<br>transport (%) | Recovery of<br>release (%) |
|------------|-------------------------------------------------------------------|--------------------|------------------------------|----------------------------|
| Loamy sand | 0                                                                 | 0.459              | 36.4                         | 17.5                       |
| Loamy sand | 25                                                                | 0.453              | 38.9                         | 17.2                       |
| Loamy sand | 50                                                                | 0.464              | 43.9                         | 15.5                       |
| Loamy sand | 90                                                                | 0.461              | 52.0                         | 15.4                       |
| Loamy sand | 160                                                               | 0.452              | 55.5                         | 12.4                       |
| Sandy loam | 0                                                                 | 0.466              | 37.7                         | 11.1                       |
| Sandy loam | 25                                                                | 0.455              | 40.1                         | 11.5                       |
| Sandy loam | 50                                                                | 0.467              | 45.0                         | 12.9                       |
| Sandy loam | 90                                                                | 0.459              | 50.8                         | 13.6                       |
| Sandy loam | 160                                                               | 0.454              | 57.8                         | 16.4                       |

Table S7. Percentages of 1,2-DCA mass recovered from the column effluents during the retention and release phases (corresponding to Fig. 10).

| Type       | Eluent       | Concentration of humic acid added with eluent (ppm) | Recovery of transport (%) | Column porosity | Recovery of release (%) |
|------------|--------------|-----------------------------------------------------|---------------------------|-----------------|-------------------------|
| Loamy sand | pH 8.5 water | 0                                                   | 35.5                      | 0.448           | 8.8                     |
| Loamy sand | –            | 50                                                  | 35.3                      | 0.446           | 11.5                    |
| Loamy sand | 200 mg/L RL  | 0                                                   | 35.6                      | 0.456           | 15.0                    |
| Loamy sand | 300 mg/L RL  | 0                                                   | 35.4                      | 0.447           | 16.9                    |
| Loamy sand | 200 mg/L RL  | 50                                                  | 35.5                      | 0.452           | 15.5                    |
| Loamy sand | 300 mg/L RL  | 50                                                  | 35.5                      | 0.461           | 17.7                    |
| Sandy loam | pH 8.5 water | 0                                                   | 38.7                      | 0.463           | 14.1                    |
| Sandy loam | –            | 50                                                  | 37.9                      | 0.447           | 17.4                    |
| Sandy loam | 200 mg/L RL  | 0                                                   | 37.8                      | 0.452           | 18.0                    |
| Sandy loam | 300 mg/L RL  | 0                                                   | 37.7                      | 0.457           | 22.6                    |
| Sandy loam | 200 mg/L RL  | 50                                                  | 37.9                      | 0.455           | 24.1                    |
| Sandy loam | 300 mg/L RL  | 50                                                  | 37.6                      | 0.443           | 29.1                    |

RL: rhamnolipid.
